# Supplementary material
Source: PubMed Central journal article supplement (PMC3831084)
Supplement: ejhg201384x3.pdf [file ejhg201384x3.pdf]

Supplemental table 1: X-inactivation pattern statistics for populations of human females.

| Reference             | Population*          | n =        | Age range    | Mean XIP (SD)** | Percentage (%) of females examined with XIP: |               |               |               |               |             |
|-----------------------|----------------------|------------|--------------|-----------------|----------------------------------------------|---------------|---------------|---------------|---------------|-------------|
|                       |                      |            |              |                 | <0.30 / >0.70                                | <0.25 / >0.75 | <0.20 / >0.80 | <0.10 / >0.90 | <0.05 / >0.95 | 0.00 / 1.00 |
| Wong (2011)           | DZ twins age 5       | 4          | 5            | 51 (13)         | 11.8                                         |               | 0             | 0             |               |             |
| Wong (2011)           | All age 5            | 8          | 5            | 52 (13)         | 12.3                                         |               | 0             | 0             |               |             |
| Wong (2011)           | MZ twins age 5       | 4          | 5            | 53 (14)         | 12.9                                         |               | 0             | 0             |               |             |
| Wong (2011)           | DZ twins age 10      | 4          | 10           | 53 (13)         | 11.4                                         |               | 5.7           | 0             |               |             |
| Amos-Landgraf (2006)  | Neonates             | 590        | 0            | 50 (15)         |                                              |               | 4.9           | 0.5           | 0.2           |             |
| Wong (2011)           | All age 10           | 12         | 10           | 53 (15)         | 17.4                                         |               | 7.3           | 1.5           |               |             |
| Busque (1996)         | Neonates             | 162        | 0            |                 |                                              | 8.6           |               | 1.9           |               |             |
| Bolduc (2008)         | Neonates             | 450        | 0            |                 |                                              | 14.2          |               | 2.7           |               |             |
| Wong (2011)           | MZ twins age 10      | 8          | 10           | 53 (17)         | 23.5                                         |               | 8.8           | 2.9           |               |             |
| Naumova (1996)        | unrelated contr      | 64         | adult        |                 |                                              |               | 14.0          |               |               |             |
| Amos-Landgraf (2006)  | Adults               | 415        | >13          | 52 (19)         |                                              |               | 14.2          | 3.5           | 1.7           |             |
| Busque (1996)         | Adults               | 67         | 28-32        |                 |                                              | 16.4          |               | 4.5           |               |             |
| Bolduc (2008)         | Mothers              | 444        | 18-43        |                 |                                              | 27.9          |               | 4.5           |               |             |
| <b>Renault (2013)</b> | <b>Utah</b>          | <b>182</b> | <b>5-83</b>  | <b>56 (20)</b>  | <b>37.4</b>                                  | <b>22.0</b>   | <b>17.6</b>   | <b>6.0</b>    | <b>1.7</b>    | <b>0.0</b>  |
| Sharp (2000)          | Younger              | 121        | <25          |                 |                                              | 28.0          |               | 7.0           |               |             |
| Beever (2003)         | control grp 1 adults | 102        | 17-45        |                 |                                              |               |               | 7.0           |               |             |
| Naumova (1996)        | incl fam with skewed | 365        | adult        |                 | 44.6                                         |               | 21.6          | 9             |               |             |
| <b>Renault (2013)</b> | <b>Denmark</b>       | <b>258</b> | <b>20-95</b> | <b>51 (24)</b>  | <b>46.1</b>                                  | <b>35.3</b>   | <b>25.2</b>   | <b>10.9</b>   | <b>5.0</b>    | <b>0.0</b>  |
| Sharp (2000)          | Older                | 139        | >60          |                 |                                              | 48.0          |               | 16.0          |               |             |
| Busque (1996)         | Older adults         | 66         | 60-96        |                 |                                              | 37.9          |               | 22.7          |               |             |
| Busque (2009)         | Elderly subset       | 40         | 66-100       |                 |                                              | 40            |               |               |               |             |
| Busque (2009)         | Adults               | 100        | 43-100       |                 |                                              | 42            |               |               |               |             |

\*populations are sorted by %<.10/>.90, %<.20/>.80, %>70 and colour coded by age: green = neonates/children, yellow = adults, blue = exclusively older women

\*\*mean and SD could be inaccurate due to data for which phase was arbitrarily assigned.
